It was noted in the discussion that rotation of the Tuohy needle may be a practice of some. If you hold a Tuohy needle steadily and rotate the needle, you will note that the sharp edge of the needle describes a very nice arc, which could cut a circular pattern through the dura. For this reason, I advocate that when an epidural needle is placed by whatever technique and the epidural space is identified, the needle should not be rotated.

I would suggest that once the dura has been violated in an attempted epidural, the procedure at that level should be abandoned and another interspace sought. Invariably, if the needle is withdrawn to what theoretically may be the epidural space, the Touhy needle will direct the catheter to the hole in the dura that has just been

made. The case presented documents the problem that many of us have seen but not followed up so elegantly.

LLOYD F. REDICK, M.D.  
*Professor of Anesthesiology  
Department of Anesthesiology  
Duke University Medical Center  
Durham, North Carolina 27710*

#### REFERENCE

1. Stevens RA, Stanton-Hicks M: Subdural injection of local anesthetics: A complication of epidural anesthesia. *ANESTHESIOLOGY* 63:323, 1985

(Accepted for publication January 13, 1986.)

Anesthesiology  
64:839, 1986

*In reply:*—I find the mechanism of subdural injection proposed by Drs. West and Redick to be very interesting. However, the epidural catheter used in our report,<sup>1</sup> like all epidural catheters used at the University of Colorado, had only one hole at the tip of the catheter. Although it is perhaps possible that the catheter tip was located in the subarachnoid space and that local anesthetic (and later contrast material) retrogradely entered the subdural space, I believe it is much more likely that the catheter tip was located in the subdural space; otherwise, this complication would be much more common in continuous spinal anesthesia, for example. Thus far there have been no such reports to my knowledge.

By whatever mechanism it occurs, subdural injection of local anesthetic is a complication of epidural anesthesia.<sup>2,3</sup> Once the subdural space is distended by either cerebrospinal fluid or local anesthetic, it is possible to insert a catheter into this space, as other authors have also demonstrated radiographically.<sup>4-6</sup> Finally, in response to Drs. West and Redick, we clearly stated in our article that subdural injection of local anesthetic is more likely after perforation of the dura.

R. A. STEVENS, M.D.  
*Institut fuer Anaesthesiologie  
Universitaet Duesseldorf  
Moorenstrasse 5  
D-4000 Duesseldorf  
West Germany*

#### REFERENCES

1. Stevens RA, Stanton-Hicks M: Subdural injection of local anesthetic: A complication of epidural anesthesia. *ANESTHESIOLOGY* 63:323-326, 1985
2. Schultz EH, Brogdon BG: The problem of subdural placement in myelography. *Radiology* 79:91-95, 1962
3. Sechzer PH: Subdural space in spinal anesthesia. *ANESTHESIOLOGY* 24:869-870, 1963
4. Boys JE, Norman PF: Accidental subdural analgesia. *Br J Anaesth* 47:1111-1113, 1975
5. Manchanda VN, Murad SHN, Shilyansky G, Mehringer M: Unusual clinical course of accidental subdural local anesthetic injection. *Anesth Analg* 62:1124-1126, 1983
6. Bridle Smith G, Barton FL, Watt JH: Extensive spread of local anaesthetic solution following subdural insertion of an epidural catheter during labour. *Anaesthesia* 39:355-358, 1984

(Accepted for publication January 13, 1986.)

Anesthesiology  
64:839-840, 1986

### Monitoring Maternal Heart Rate during Epidural Injection of a Test Dose Containing Epinephrine

*To the Editor:*—The potential for local anesthetic toxicity following epidural injection has prompted Moore and Batra<sup>1</sup> to suggest that an increase in heart rate after the injection of a test dose containing 0.015 mg epineph-

rine is both sensitive and specific for the identification of intravascular injection.

Recently, Abraham *et al.*<sup>2</sup> reported the administration of an epidural test dose containing 0.015 mg epinephrine
